# Supplementary material for: Surfactant-assisted fabrication and supercapacitor performances of a 12-phosphomolybdate-pillared metal–organic framework containing a helix and its SWNT nanocomposites
Source: Royal Society of Chemistry journal article supplement (doi:10.1039/d1ce01471d), 2021-12-07
Supplement: d1ce01471d1.pdf [file d1ce01471d1.pdf]

## Supporting Information

### Surfactant-assisted Fabrication and Supercapacitor Performances of 12-phosphomolybdate-pillared Metal-Organic Framework Containing Helix and its SWNT Nanocomposites

Jin-Long Zhuo,<sup>a,b</sup> Yun-Liang Wang,<sup>a</sup> Yu-Guang Wang,<sup>b</sup> Ming-Qi Xu,<sup>a,b</sup> Jing-Quan  
Sha<sup>a,b</sup>\*

<sup>a</sup> College of Materials Science & Engineering, Jiamusi University, Heilongjiang, Jiamusi,  
154007, P.R. China

<sup>b</sup> School of Chemistry, Chemical Engineering and Materials, Jining University,  
Shandong, Qufu, 273155, P. R. China

\*Corresponding author. [shajq2002@126.com](mailto:shajq2002@126.com)

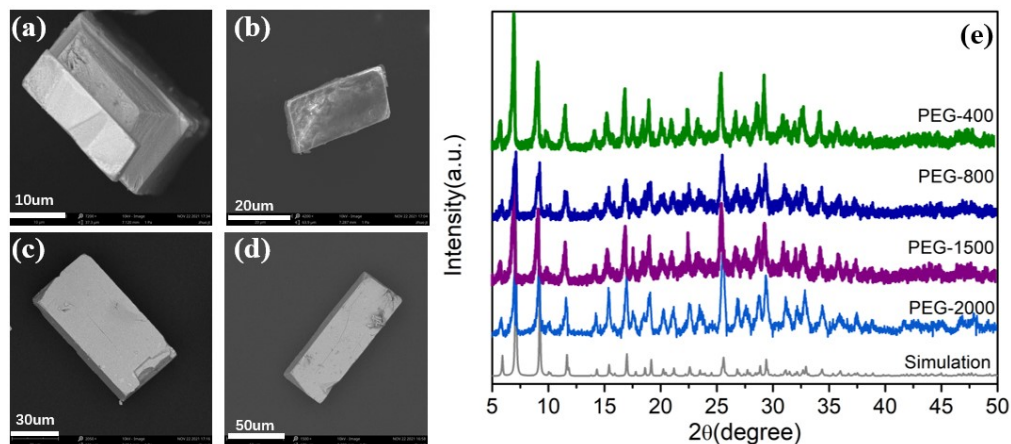

Fig. S1 SEM(a)-(d) and XRD (e) of crystalline compound NiPMo<sub>12</sub> obtained at different PEG molecular weight (400, 800, 1500, 2000).

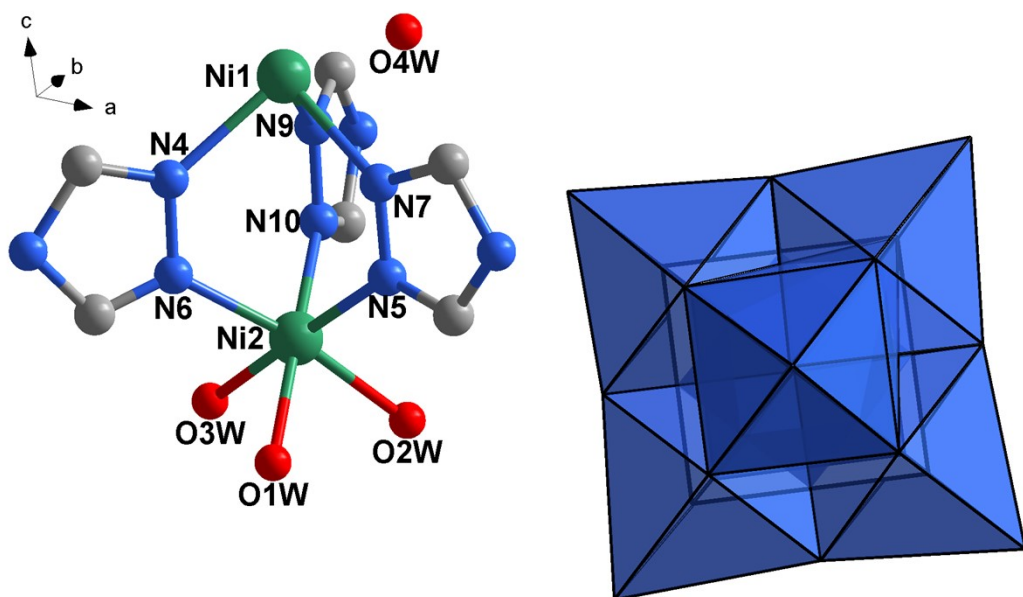

**Fig. S2** Combined ball and stick representation of the asymmetric unit of compound  $[\text{Ni}_3(1,2,4\text{-Tri})_6(\text{H}_2\text{O})_8][\text{H}_2\text{W}_6\text{O}_{19}]_2$ . Water molecules and all hydrogen atoms are omitted for clarity.

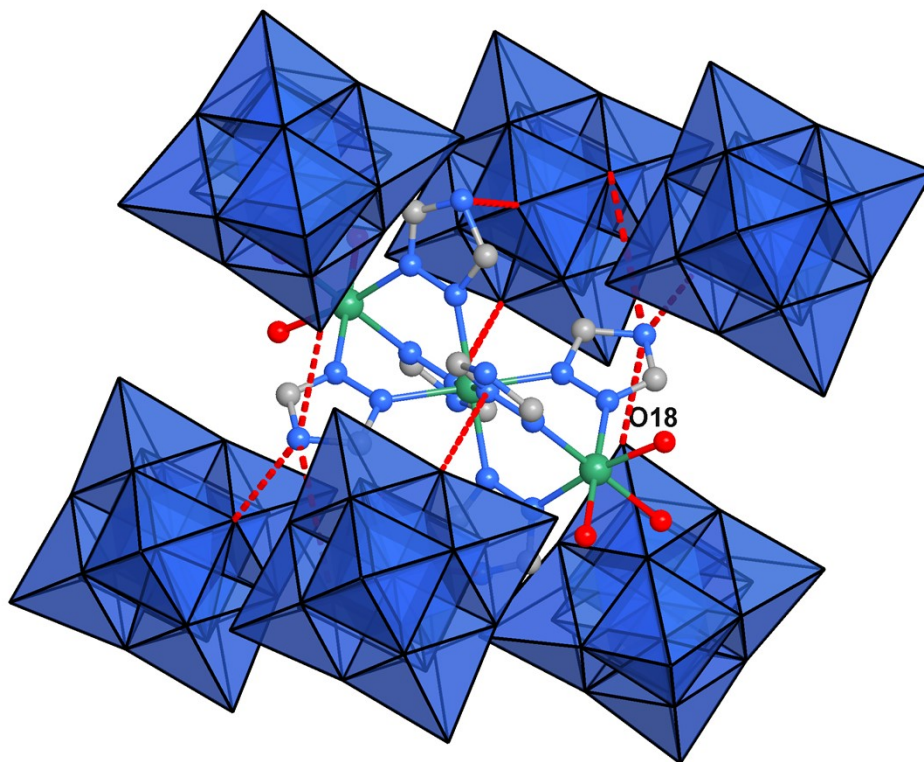

**Fig. S3** Combined ball and stick representation of the linking mode between  $[\text{W}_6\text{O}_{19}]^{4-}$  and  $[\text{Ni}_3(1,2,4\text{Tri})_6]^{3+}$  subunits

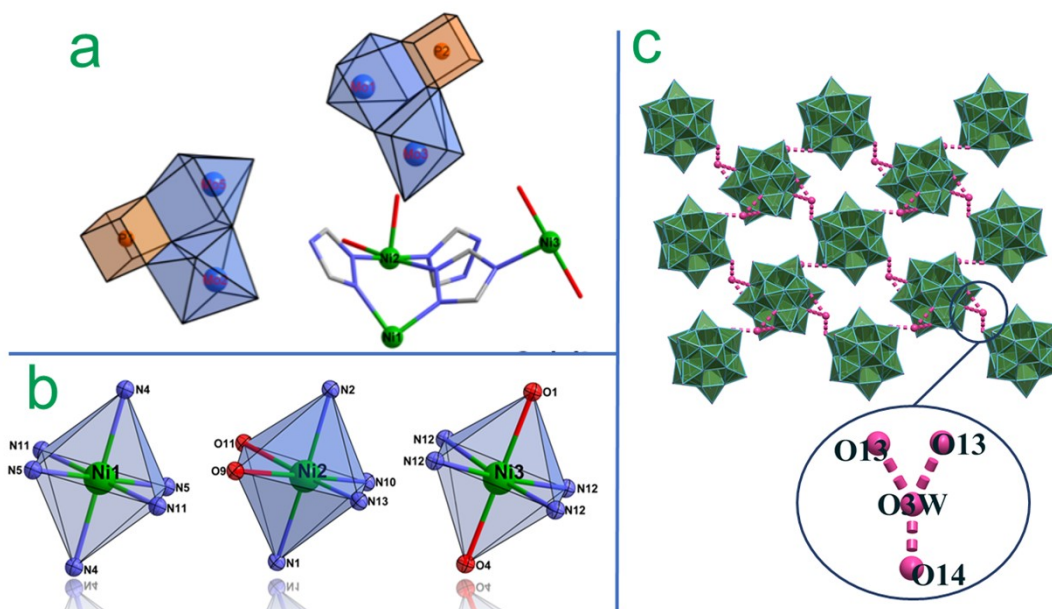

**Fig.S4** (a) Combined polyhedral representation of the molecular structure unit of compound Ni PMo<sub>12</sub>. (b) Coordination fashions of three crystallographic unique Ni<sup>II</sup> ions. (c) adjacent PMo<sub>12</sub> are linked each other by 2O13...O3W...O14 supramolecular bonds.

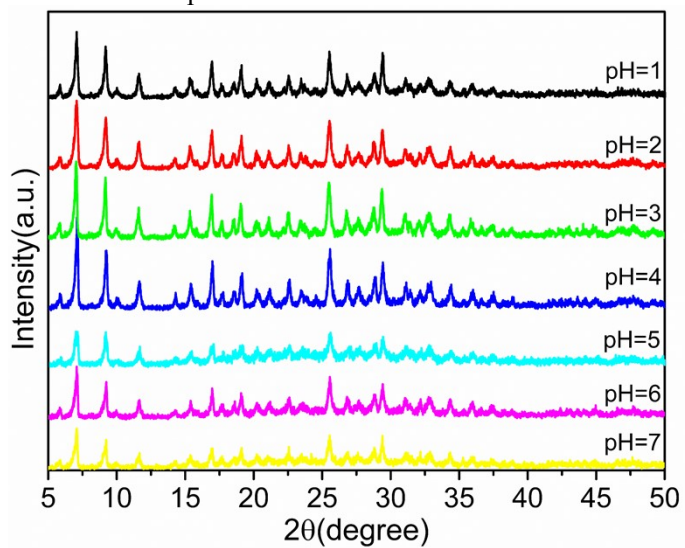

**Fig. S5** PXRD of Ni PMo<sub>12</sub> in different pH.

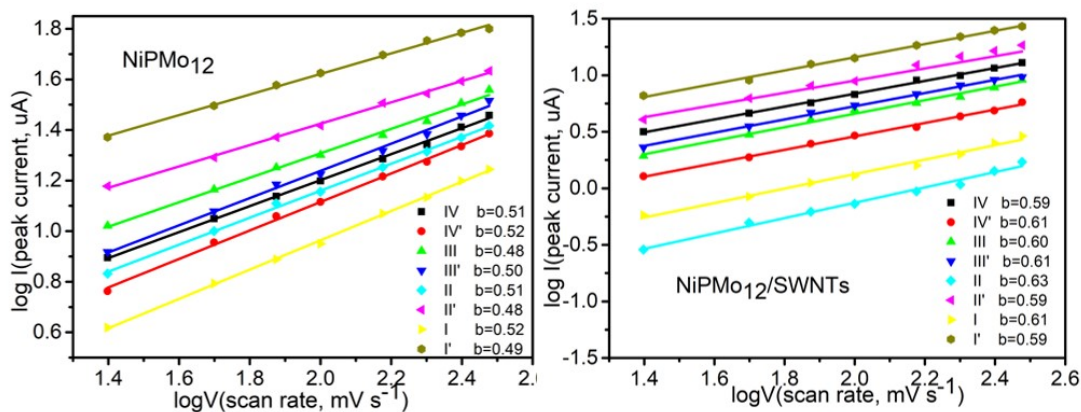

Fig. S6 The calculated b-values for the NiPMo<sub>12</sub> and NiPMo<sub>12</sub>/SWNTs nanocomposite

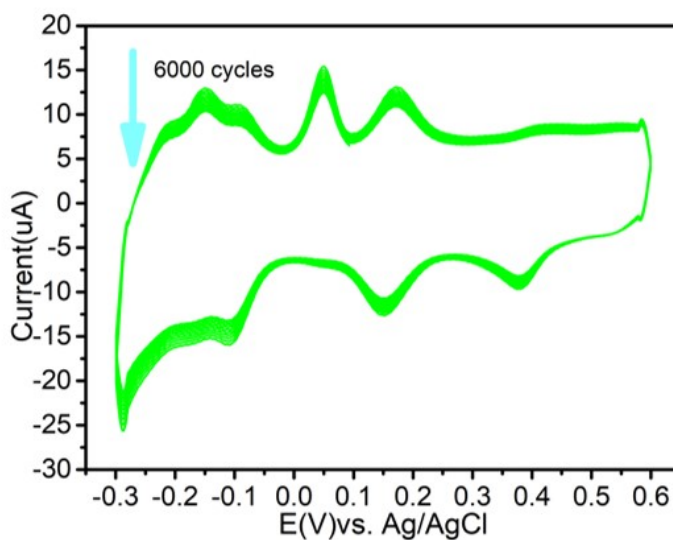

Fig. S7 CV curves of the 1st to 6000th cycle toward the NiPMo<sub>12</sub>/SWNTs sample at the scan rate of 125mV s<sup>-1</sup>

Table S1. Selected bond lengths (Å) and bond angles (°) for NiPMo<sub>12</sub>.

| Bond       | Lengths   | Bond         | Lengths   |
|------------|-----------|--------------|-----------|
| C(1)-N(1)  | 1.336(11) | Mo(1)-O(10)  | 1.904(8)  |
| C(1)-N(2)  | 1.340(11) | Mo(1)-O(12)3 | 2.463(12) |
| C(2)-N(1)  | 1.347(11) | Mo(1)-O(12)  | 2.463(12) |
| C(2)-N(3)  | 1.312(11) | Mo(3)-O(7)   | 1.615(7)  |
| C(3)-N(7)  | 1.347(11) | Mo(3)-O(8)   | 1.890(8)  |
| C(3)-N(8)  | 1.319(12) | Mo(3)-O(10)4 | 1.882(8)  |
| C(4)-N(7)  | 1.348(12) | Mo(3)-O(11)5 | 1.899(8)  |
| C(4)-N(9)1 | 1.334(11) | Mo(3)-O(11)  | 1.913(8)  |
| C(5)-N(4)  | 1.296(12) | Mo(3)-O(12)  | 2.428(12) |
| C(5)-N(6)  | 1.371(15) | Mo(3)-O(12)5 | 2.462(12) |
| C(6)-N(5)  | 1.312(14) | O(12)-O(12)3 | 1.77(2)   |
| C(6)-N(6)  | 1.337(14) | O(12)-O(12)2 | 1.781(16) |
| N(1)-Ni(2) | 2.080(7)  | O(12)-O(12)5 | 1.781(16) |
| N(2)-N(3)  | 1.369(10) | O(12)-P(1)   | 1.539(11) |

|              |           |             |           |
|--------------|-----------|-------------|-----------|
| N(2)-Ni(1)   | 2.064(7)  | Mo(2)-O(2)  | 1.954(9)  |
| N(3)-Ni(3)   | 2.065(7)  | Mo(2)-O(3)  | 1.644(8)  |
| N(4)-N(5)    | 1.381(11) | Mo(2)-O(4)  | 1.854(9)  |
| N(4)-Ni(1)   | 2.121(8)  | Mo(2)-O(4)5 | 1.940(9)  |
| N(5)-Ni(3)   | 2.090(8)  | Mo(2)-O(5)  | 1.852(8)  |
| N(7)-Ni(3)   | 2.098(7)  | Mo(2)-O(6)2 | 2.442(12) |
| N(8)-N(9)1   | 1.373(10) | Mo(2)-O(6)  | 2.474(12) |
| N(8)-Ni(1)2  | 2.116(7)  | Mo(4)-O(1)  | 1.625(11) |
| N(9)-Ni(3)   | 2.054(8)  | Mo(4)-O(2)6 | 1.880(8)  |
| Ni(2)-O(13)  | 2.074(14) | Mo(4)-O(2)  | 1.880(8)  |
| Ni(2)-O(14)  | 2.099(12) | Mo(4)-O(5)5 | 1.922(9)  |
| Ni(3)-O(15)  | 2.094(7)  | Mo(4)-O(5)7 | 1.922(9)  |
| Ni(3)-O(16)  | 2.144(7)  | Mo(4)-O(6)  | 2.430(13) |
| O(18)-O(18)3 | 0.79(7)   | Mo(4)-O(6)6 | 2.430(13) |
| Mo(1)-O(8)   | 1.867(8)  | O(6)-O(6)2  | 1.775(18) |
| Mo(1)-O(8)3  | 1.867(8)  | O(6)-O(6)5  | 1.775(18) |
| Mo(1)-O(9)   | 1.655(11) | O(6)-O(6)6  | 1.75(2)   |
| Mo(1)-O(10)3 | 1.904(8)  | O(6)-P(2)   | 1.530(12) |

| <b>Bond</b>       | <b>Angles</b> | <b>Bond</b>         | <b>Angles</b> |
|-------------------|---------------|---------------------|---------------|
| N(1)-C(1)-N(2)    | 113.3(8)      | O(12)7-O(12)-Mo(3)  | 131.0(3)      |
| N(3)-C(2)-N(1)    | 113.4(8)      | O(12)7-O(12)-O(12)2 | 90.001(3)     |
| N(8)-C(3)-N(7)    | 113.9(8)      | O(12)5-O(12)-O(12)2 | 90.003(2)     |
| N(9)1-C(4)-N(7)   | 112.9(8)      | O(12)7-O(12)-O(12)5 | 90.001(1)     |
| N(4)-C(5)-N(6)    | 109.3(9)      | P(1)-O(12)-Mo(1)    | 123.8(6)      |
| N(5)-C(6)-N(6)    | 109.3(9)      | P(1)-O(12)-Mo(3)    | 124.4(6)      |
| C(1)-N(1)-C(2)    | 109.4(10)     | P(1)-O(12)-Mo(3)2   | 122.3(6)      |
| C(1)-N(1)-Ni(2)   | 102.0(7)      | P(1)-O(12)-O(12)5   | 54.7(2)       |
| C(2)-N(1)-Ni(2)   | 133.7(6)      | P(1)-O(12)-O(12)7   | 54.9(4)       |
| C(1)-N(2)-N(3)    | 123.7(6)      | O(12)-P(1)-O(12)10  | 180           |
| C(1)-N(2)-Ni(1)   | 104.9(7)      | O(12)6-P(1)-O(12)2  | 70.7(4)       |
| N(3)-N(2)-Ni(1)   | 131.6(6)      | O(12)2-P(1)-O(12)8  | 180.0(7)      |
| C(2)-N(3)-N(2)    | 122.6(5)      | O(12)10-P(1)-O(12)2 | 109.3(4)      |
| C(2)-N(3)-Ni(3)   | 106.4(7)      | O(12)9-P(1)-O(12)8  | 109.3(4)      |
| N(2)-N(3)-Ni(3)   | 126.8(6)      | O(12)7-P(1)-O(12)2  | 109.7(9)      |
| C(5)-N(4)-N(5)    | 126.4(6)      | O(12)9-P(1)-O(12)2  | 109.3(4)      |
| C(5)-N(4)-Ni(1)   | 107.4(8)      | O(12)10-P(1)-O(12)5 | 70.3(9)       |
| N(5)-N(4)-Ni(1)   | 107.4(8)      | O(12)-P(1)-O(12)8   | 109.3(4)      |
| C(6)-N(5)-N(4)    | 124.0(7)      | O(12)10-P(1)-O(12)6 | 109.3(4)      |
| C(6)-N(5)-Ni(3)   | 128.6(6)      | O(12)6-P(1)-O(12)8  | 109.3(4)      |
| N(4)-N(5)-Ni(3)   | 107.6(8)      | O(12)5-P(1)-O(12)2  | 70.3(9)       |
| C(6)-N(6)-C(5)    | 132.5(7)      | O(12)-P(1)-O(12)5   | 109.3(4)      |
| C(3)-N(7)-C(4)    | 119.7(6)      | O(12)-P(1)-O(12)9   | 109.7(9)      |
| C(3)-N(7)-Ni(3)   | 106.2(9)      | O(12)9-P(1)-O(12)5  | 70.7(4)       |
| C(4)-N(7)-Ni(3)   | 101.8(7)      | O(12)10-P(1)-O(12)8 | 70.7(4)       |
| C(3)-N(8)-N(9)1   | 129.5(6)      | O(12)-P(1)-O(12)6   | 180.0(7)      |
| C(3)-N(8)-Ni(1)2  | 128.1(6)      | O(12)5-P(1)-O(12)8  | 70.7(4)       |
| N(9)1-N(8)-Ni(1)2 | 105.6(7)      | O(12)9-P(1)-O(12)6  | 109.7(9)      |
| C(4)3-N(9)-N(8)3  | 130.3(6)      | O(12)-P(1)-O(12)7   | 70.3(9)       |
| C(4)3-N(9)-Ni(3)  | 122.1(5)      | O(12)5-P(1)-O(12)6  | 109.7(9)      |
| N(8)3-N(9)-Ni(3)  |               | O(12)7-P(1)-O(12)8  | 70.3(9)       |
| N(2)-Ni(1)-N(2)4  |               |                     |               |

|                    |            |                     |          |
|--------------------|------------|---------------------|----------|
| N(2)-Ni(1)-N(4)4   | 105.8(7)   | O(12)9-P(1)-O(12)7  | 109.3(4) |
| N(2)4-Ni(1)-N(4)   | 128.4(6)   | O(12)10-P(1)-O(12)9 | 70.3(9)  |
| 4N(2)-Ni(1)-N(4)   | 125.7(5)   | O(12)-P(1)-O(12)2   | 70.7(4)  |
| N(2)4-Ni(1)-N(4)   | 180.0(4)   | O(12)10-P(1)-O(12)7 | 70.7(4)  |
| N(2)-Ni(1)-N(8)3   | 89.5(3)    | O(12)6-P(1)-O(12)7  | 70.7(4)  |
| N(2)4-Ni(1)-N(8)5  | 90.5(3)    | O(12)5-P(1)-O(12)7  | 70.7(4)  |
| N(2)-Ni(1)-N(8)5   | 90.5(3)    | O(2)-Mo(2)-O(6)2    | 70.7(4)  |
| N(2)4-Ni(1)-N(8)3  | 89.5(3)    | O(2)-Mo(2)-O(6)     | 70.7(4)  |
| N(4)4-Ni(1)-N(4)   | 89.5(3)    | O(3)-Mo(2)-O(2)     | 109.7(9) |
| N(8)5-Ni(1)-N(4)   | 89.0(3)    | O(3)-Mo(2)-O(4)5    | 180.0(7) |
| N(8)3-Ni(1)-N(4)4  | 89.0(3)    | O(3)-Mo(2)-O(4)     | 109.3(4) |
| N(8)5-Ni(1)-N(4)4  | 91.0(3)    | O(3)-Mo(2)-O(5)     | 95.3(4)  |
|                    |            | O(3)-Mo(2)-O(6)     | 64.4(4)  |
| N(8)3-Ni(1)-N(8)5  | 91.0(3)    | O(3)-Mo(2)-O(6)2    | 98.7(5)  |
| N(1)-Ni(2)-N(1)6   | 180        | O(4)-Mo(2)-O(2)     | 99.6(5)  |
| N(1)6-Ni(2)-N(1)5  | 89.6(3)    | O(4)5-Mo(2)-O(2)    | 102.3(5) |
| N(1)-Ni(2)-N(1)2   | 89.6(3)    | O(4)-Mo(2)-O(4)5    | 102.6(5) |
| N(1)-Ni(2)-N(1)5   | 90.4(3)    | O(4)-Mo(2)-O(6)     | 156.1(4) |
| N(1)6-Ni(2)-N(1)2  | 90.4(3)    | O(4)-Mo(2)-O(6)2    | 161.6(4) |
| N(1)5-Ni(2)-N(1)2  | 180.0(4)   | O(4)5-Mo(2)-O(6)    | 158.5(5) |
| N(1)5-Ni(2)-O(14)  | 175.3(4)   | O(5)-Mo(2)-O(2)     | 84.7(3)  |
| N(1)2-Ni(2)-O(14)  | 89.902(19) | O(5)-Mo(2)-O(4)     | 87.4(6)  |
| N(1)6-Ni(2)-O(14)  | 89.902(19) | O(5)-Mo(2)-O(4)5    | 94.2(5)  |
| N(1)-Ni(2)-O(14)   | 89.902(19) | O(5)-Mo(2)-O(6)     | 65.3(5)  |
| O(13)-Ni(2)-N(1)2  | 89.902(19) | O(5)-Mo(2)-O(6)2    | 93.5(5)  |
| O(13)-Ni(2)-N(1)   | 89.902(19) | O(6)2-Mo(2)-O(6)    | 63.6(4)  |
| O(13)-Ni(2)-N(1)5  | 175.3(4)   | O(1)-Mo(4)-O(2)11   | 88.1(4)  |
| O(13)-Ni(2)-N(1)6  | 87.6(2)    | O(1)-Mo(4)-O(2)     | 91.6(4)  |
| O(13)-Ni(2)-O(14)  | 87.6(2)    | O(1)-Mo(4)-O(5)5    | 157.5(5) |
| N(3)-Ni(3)-N(5)    | 87.6(2)    | O(1)-Mo(4)-O(5)12   | 94.1(5)  |
| N(3)-Ni(3)-N(7)    | 87.6(2)    | O(1)-Mo(4)-O(6)     | 65.9(4)  |
| N(3)-Ni(3)-O(15)   | 87.6(2)    | O(2)11-Mo(4)-O(2)   | 42.3(5)  |
| N(3)-Ni(3)-O(16)   | 92.4(2)    | O(2)-Mo(4)-O(5)5    | 99.9(5)  |
| N(5)-Ni(3)-N(7)    | 92.4(2)    | O(2)11-Mo(4)-O(5)5  | 99.9(5)  |
| N(5)-Ni(3)-O(15)   | 92.4(2)    | O(2)-Mo(4)-O(5)12   | 99.7(5)  |
| N(5)-Ni(3)-O(16)   | 92.4(2)    | O(2)11-Mo(4)-O(5)12 | 99.7(5)  |
| N(7)-Ni(3)-O(16)   | 180        | O(2)11-Mo(4)-O(6)   | 99.7(5)  |
| N(9)-Ni(3)-N(3)    | 89.2(3)    | O(2)-Mo(4)-O(6)     | 158.8(3) |
| N(9)-Ni(3)-N(5)    | 90.1(3)    | O(2)11-Mo(4)-O(6)11 | 158.8(3) |
| N(9)-Ni(3)-N(7)    | 91.7(3)    | O(2)-Mo(4)-O(6)11   | 91.6(5)  |
| N(9)-Ni(3)-O(15)   | 174.7(3)   | O(5)5-Mo(4)-O(5)12  | 88.5(4)  |
| N(9)-Ni(3)-O(16)   | 176.5(3)   | O(5)12-Mo(4)-O(6)11 | 160.1(5) |
| O(15)-Ni(3)-N(7)   | 87.4(3)    | O(5)5-Mo(4)-O(6)    | 160.1(5) |
| O(15)-Ni(3)-O(16)  | 92.9(3)    | O(5)12-Mo(4)-O(6)   | 88.5(4)  |
| O(8)-Mo(1)-O(8)7   | 87.5(3)    | O(6)11-Mo(4)-O(6)   | 96.5(5)  |
| O(8)-Mo(1)-O(10)   | 95.6(3)    | Mo(4)-O(2)-Mo(2)    | 66.3(4)  |
| O(8)-Mo(1)-O(10)7  | 88.3(3)    | Mo(2)-O(4)-Mo(2)2   |          |
| O(8)7-Mo(1)-O(10)  | 95.2(3)    | Mo(2)-O(5)-Mo(4)2   |          |
| O(8)7-Mo(1)-O(10)7 |            |                     |          |
| O(8)-Mo(1)-O(12)7  |            |                     |          |
| O(8)7-Mo(1)-O(12)7 |            |                     |          |

|                     |          |                    |           |
|---------------------|----------|--------------------|-----------|
| O(8)-Mo(1)-O(12)    | 171.5(3) | Mo(2)5-O(6)-Mo(2)  | 66.3(4)   |
| O(8)7-Mo(1)-O(12)   | 89.4(3)  | Mo(4)-O(6)-Mo(2)5  | 96.5(5)   |
| O(9)-Mo(1)-O(8)     | 89.2(3)  | Mo(4)-O(6)-Mo(2)   | 84.8(6)   |
| O(9)-Mo(1)-O(8)7    | 83.5(3)  | O(6)2-O(6)-Mo(2)   | 65.3(4)   |
| O(9)-Mo(1)-O(10)7   | 87.8(6)  | O(6)5-O(6)-Mo(2)5  | 65.3(4)   |
| O(9)-Mo(1)-O(10)    | 156.5(5) | O(6)2-O(6)-Mo(2)5  | 93.9(5)   |
| O(9)-Mo(1)-O(12)7   | 88.3(4)  | O(6)11-O(6)-Mo(2)5 | 93.9(5)   |
| O(9)-Mo(1)-O(12)    | 88.3(4)  | O(6)11-O(6)-Mo(2)  | 42.2(6)   |
| O(10)-Mo(1)-O(10)7  | 156.5(5) | O(6)5-O(6)-Mo(2)   | 136.3(6)  |
| O(10)7-Mo(1)-O(12)7 | 93.4(5)  | O(6)2-O(6)-Mo(4)   | 138.3(6)  |
| O(10)7-Mo(1)-O(12)  | 63.9(4)  | O(6)11-O(6)-Mo(4)  | 135.8(6)  |
| O(10)-Mo(1)-O(12)7  | 63.9(4)  | O(6)5-O(6)-Mo(4)   | 92.3(4)   |
| O(10)-Mo(1)-O(12)   | 93.4(5)  | O(6)11-O(6)-O(6)2  | 91.7(4)   |
| O(12)7-Mo(1)-O(12)  | 102.4(5) | O(6)5-O(6)-O(6)2   | 93.0(4)   |
| O(7)-Mo(3)-O(8)     | 102.4(5) | O(6)11-O(6)-O(6)5  | 67.9(6)   |
| O(7)-Mo(3)-O(10)8   | 101.1(4) | P(2)-O(6)-Mo(2)    | 69.8(6)   |
| O(7)-Mo(3)-O(11)5   | 101.1(4) | P(2)-O(6)-Mo(2)5   | 131.5(3)  |
| O(7)-Mo(3)-O(11)    | 158.9(3) | P(2)-O(6)-Mo(4)    | 131.6(3)  |
| O(7)-Mo(3)-O(12)    | 158.9(3) | P(2)-O(6)-O(6)5    | 131.0(3)  |
| O(7)-Mo(3)-O(12)5   | 86.1(6)  | P(2)-O(6)-O(6)2    | 130.9(3)  |
| O(8)-Mo(3)-O(11)5   | 93.2(4)  | P(2)-O(6)-O(6)11   | 131.3(8)  |
| O(8)-Mo(3)-O(11)    | 64.2(4)  | O(6)11-P(2)-O(6)   | 68.9(3)   |
| O(8)-Mo(3)-O(12)5   | 64.2(4)  | O(6)13-P(2)-O(6)12 | 131.3(8)  |
| O(8)-Mo(3)-O(12)    | 93.2(4)  | O(6)11-P(2)-O(6)12 | 89.994(5) |
| O(10)8-Mo(3)-O(8)   | 42.2(5)  | O(6)14-P(2)-O(6)   | 89.998(7) |
| O(10)8-Mo(3)-O(11)  | 101.5(5) | O(6)14-P(2)-O(6)12 | 89.996(6) |
| O(10)8-Mo(3)-O(11)5 | 101.9(5) | O(6)13-P(2)-O(6)14 | 122.5(7)  |
| O(10)8-Mo(3)-O(12)  | 101.2(5) | O(6)13-P(2)-O(6)   | 124.3(7)  |
| O(10)8-Mo(3)-O(12)5 | 100.9(5) | O(6)11-P(2)-O(6)2  | 124.0(6)  |
| O(11)-Mo(3)-O(12)   | 158.6(4) | O(6)11-P(2)-O(6)13 | 54.6(2)   |
| O(11)-Mo(3)-O(12)5  | 158.7(4) | O(6)5-P(2)-O(6)12  | 54.6(2)   |
| O(12)-Mo(3)-O(12)5  | 157.3(5) | O(6)6-P(2)-O(6)13  | 55.1(4)   |
| Mo(1)-O(8)-Mo(3)    | 87.9(3)  | O(6)6-P(2)-O(6)    | 69.8(9)   |
| Mo(3)9-O(10)-Mo(1)  | 94.8(5)  | O(6)13-P(2)-O(6)5  | 110.2(9)  |
| Mo(3)2-O(11)-Mo(3)  | 64.5(4)  | O(6)14-P(2)-O(6)2  | 70.9(4)   |
| Mo(3)2-O(12)-Mo(1)  | 88.4(4)  | O(6)11-P(2)-O(6)14 | 180       |
| Mo(3)-O(12)-Mo(1)   | 157.2(5) | O(6)5-P(2)-O(6)    | 70.9(4)   |
| Mo(3)-O(12)-Mo(3)2  | 87.9(3)  | O(6)6-P(2)-O(6)14  | 70.9(4)   |
| O(12)2-O(12)-Mo(1)  | 94.0(4)  | O(6)6-P(2)-O(6)12  | 70.9(4)   |
| O(12)7-O(12)-Mo(1)  | 64.5(4)  | O(6)12-P(2)-O(6)   | 109.1(4)  |
| O(12)5-O(12)-Mo(1)  | 86.8(5)  | O(6)11-P(2)-O(6)6  | 109.1(4)  |
| O(12)5-O(12)-Mo(3)  | 93.5(4)  | O(6)5-P(2)-O(6)14  | 70.9(4)   |
| O(12)5-O(12)-Mo(3)2 | 63.6(4)  | O(6)6-P(2)-O(6)2   | 69.8(9)   |
| O(12)7-O(12)-Mo(3)2 |          | O(6)2-P(2)-O(6)2   | 109.1(4)  |
| O(12)2-O(12)-Mo(3)  |          | O(6)5-P(2)-O(6)2   |           |
| O(12)2-O(12)-Mo(3)2 |          |                    |           |

Symmetry transformations used to generate equivalent atoms: 2+y,1/2-x,3/2-z; 2-y,+x,+z;

3+x,+y,1-z; 4+y,-x,1-z; 5+y,-x,+z; 6+x,+y,2-z; 7+y,-x,2-z; 1-1/2+y,1/2-x,3/2-z; 2-y,+x,+z; 31/2-y,1/2+x,3/2-z; 41/2-x,1/2-y,3/2-z; 5+y,-x,+z; 6-x,-y,+z; 7+x,+y,1-z; 8+y,-x,1-z; 9-y,+x,1-z; 10-x,-y,1-z; 11+x,+y,2-z; 12+y,-x,2-z; 13-y,+x,2-z; 14-x,-Y,2-z.

Table S2 The synthesis schemes for crystalline NiPMo<sub>12</sub>.

| Unit (mg) | PMo <sub>12</sub> | Ni(NO <sub>3</sub> ) <sub>2</sub> | 1,2,4-trz | NH <sub>4</sub> VO <sub>3</sub> | surfactant | Product                          |
|-----------|-------------------|-----------------------------------|-----------|---------------------------------|------------|----------------------------------|
| No.1      | 300               | 150                               | 65        | 36                              | 0          | No crystal                       |
| No.2      | 300               | 150                               | 65        | 36                              | PEG-2000   | NiPMo <sub>12</sub>              |
| No.3      | 300               | 150                               | 65        | 36                              | PEG-1500   | NiPMo <sub>12</sub>              |
| No.4      | 300               | 150                               | 65        | 36                              | PEG-800    | NiPMo <sub>12</sub>              |
| No.5      | 300               | 150                               | 65        | 36                              | PEG-400    | NiPMo <sub>12</sub>              |
| No.6      | 300               | 150                               | 65        | 36                              | SDBS       | No crystal                       |
| No.7      | 300               | 150                               | 65        | 36                              | PVP        | No crystal                       |
| No.8      | 300               | 150                               | 65        | 0                               | PEG*       | No crystal                       |
| No.9      | SiW <sub>12</sub> | 150                               | 65        | 36                              | PEG-1500*  | NiW <sub>6</sub> O <sub>19</sub> |
| No.10     | SiW <sub>12</sub> | 150                               | 65        | 36                              | SDBS       | No crystal                       |
| No.11     | SiW <sub>12</sub> | 150                               | 65        | 36                              | PVP        | No crystal                       |

\* PEG: 2000, 1500, 800, 400

Table S3 Crystallographic data and structural refinements for [Ni<sub>3</sub>(1,2,4Tri)<sub>6</sub>(H<sub>2</sub>O)<sub>8</sub>][H<sub>2</sub>W<sub>6</sub>O<sub>19</sub>]<sub>2</sub>.

| Compounds                            | [Ni <sub>3</sub> (1,2,4Tri) <sub>6</sub> (H <sub>2</sub> O) <sub>8</sub> ][H <sub>2</sub> W <sub>6</sub> O <sub>19</sub> ] <sub>2</sub> |
|--------------------------------------|-----------------------------------------------------------------------------------------------------------------------------------------|
| Chemical formula                     | C <sub>12</sub> H <sub>12</sub> N <sub>18</sub> Ni <sub>3</sub> O <sub>46</sub> W <sub>12</sub>                                         |
| Formula weight                       | 3526.55                                                                                                                                 |
| Temperature (K)                      | 293(2)                                                                                                                                  |
| Wavelength (Å)                       | 0.71073                                                                                                                                 |
| Crystal system                       | Monoclinic                                                                                                                              |
| Space group                          | <i>P</i> 21/ <i>n</i>                                                                                                                   |
| a(Å)                                 | 11.942(4)                                                                                                                               |
| b(Å)                                 | 20.015(7)                                                                                                                               |
| c(Å)                                 | 14.729(5)                                                                                                                               |
| α(°)                                 | 90                                                                                                                                      |
| β(°)                                 | 99.586(6)                                                                                                                               |
| γ(°)                                 | 90                                                                                                                                      |
| V(Å <sup>3</sup> ) / Z               | 3471(2) / 2                                                                                                                             |
| Density (g·cm <sup>-3</sup> )        | 2.734                                                                                                                                   |
| Abs coeff. (mm <sup>-1</sup> )       | 5.793                                                                                                                                   |
| F(000)                               | 3100.0                                                                                                                                  |
| Data collect θ range                 | 1.732-27.631                                                                                                                            |
| Reflns collected                     | 20726                                                                                                                                   |
| Independent reflns /R <sub>int</sub> | 7864/0.0612                                                                                                                             |
| Data/restraints/parameters           | 7864 / 16 / 412                                                                                                                         |



---

|                                                  |                               |
|--------------------------------------------------|-------------------------------|
| Goodness-of-fit on $F^2$                         | 1.023                         |
| Final R indices [ $I > 2\delta(I)$ ]             | $R_1 = 0.0707, wR_2 = 0.2109$ |
| R indices (all data)                             | $R_1 = 0.1247, wR_2 = 0.2451$ |
| Largest diff. peak and hole (e.Å <sup>-3</sup> ) | 7.913 and -6.013              |

---

$$R_1 = \frac{\sum(|F_0| - |F_c|)}{\sum|F_0|}, wR_2 = \frac{\sum w(|F_0|^2 - |F_c|^2)^2}{\sum w(|F_0|^2)^2}^{1/2}$$
